# Supplementary material for: Epithelial cell-derived exosomes carry NamiRNA-143-5p and promote ASPN expression in fibroblasts to drive Helicobacter pylori infected gastritis progression
Source: Research Square preprint supplement (doi:10.21203/rs.3.rs-7945968/v1), 2025-11-24
Supplement: Supplementary file 1 [file 78ad5036b9e42aa7afa16a0a.xlsx]

## Sheet: Sheet3
#ID	NC-1	NC-2	NC-3	HP-1	HP-2	HP-3
hsa-miR-200a-3p	4889.35	4661.72	5116.99	125.858	114.28	154.249
hsa-miR-27a-3p	7121.76	6841.07	7402.45	914.238	1140.09	1344.38
hsa-miR-151a-5p	225.991	252.341	199.641	1216.22	1148.02	1118.75
hsa-miR-210-3p	762.55	699.412	759.865	73.146	114.349	138.381
hsa-miR-10b-5p	2889.13	2674.66	3103.59	114.047	67.825	80.9082
hsa-miR-23a-3p	2799.66	2931.05	2668.26	1108.75	1171.8	996.01
hsa-miR-497-5p	70.7293	0	0	653.088	757.07	734.198
hsa-miR-934	555.214	679.063	641.558	0	0	0
hsa-miR-22-3p	743.19	227.072	300.698	FALSE	7156.55	6910.96
hsa-miR-195-5p	331.329	327.326	335.332	1299.38	1537.3	1442.74
hsa-miR-374a-3p	59502.8	57350.6	61655	80423.3	81991.8	80228
hsa-miR-455-5p	251.605	185.834	328.385	965.645	962.91	1057.37
hsa-miR-200c-5p	349.509	343.905	182.686	1704.78	2037.87	1905.48
hsa-miR-193b-5p	163.361	192.892	162.143	6681.85	8632.05	7436.09
hsa-miR-21-3p	466.27	488.793	514.448	1253.91	1382.66	1175.08
hsa-miR-19a-3p	2948.39	2738.76	3158.01	1186.29	1381.44	1305.69
hsa-miR-30a-5p	23000.8	23634.9	22366.8	10586.3	9239.35	6827.88
hsa-miR-30d-5p	19663.1	19789	19537.2	9089.77	7717.91	5606.58
hsa-miR-30e-5p	20679	21711.9	19646	9256.06	8132.86	6217.23
hsa-miR-505-3p	365.28	363.604	417.218	35.0169	83.3168	0
hsa-miR-100-5p	579.94	367.611	431.219	5319.24	6414.49	4926.41
hsa-miR-190a-5p	451.745	669.026	618.086	8798.36	6719.81	7246.43
hsa-miR-23a-5p	6462.76	7482.05	5443.48	32867.6	34965.5	27331
hsa-miR-194-5p	310.865	481.418	383.806	4274.5	3262.93	3456.72
hsa-miR-196a-5p	5779.47	4593.71	4767.61	867.884	1415.17	1367.09
hsa-miR-200b-3p	1093.89	949.308	1307.88	164.201	146.436	136.976
hsa-miR-199b-3p	70.0777	101.234	138.297	517.084	654.741	509.712
hsa-miR-181b-2-3p	622.901	618.612	459.283	1389.24	1221.69	1207.6
hsa-miR-26b-5p	760.259	893.326	627.191	102.165	54.6943	56.488
hsa-miR-26a-5p	5585.92	5238.61	5933.23	2272.34	3153.61	2309.07
hsa-miR-12136	439.06	396.804	411.647	733.253	669.649	635.832
hsa-let-7e-5p	1355.12	933.436	1055.78	57.5038	89.3326	83.2954
hsa-miR-143-5p	7924.15	7738.45	8109.86	50326.9	43817.5	35284.1
hsa-miR-15a-5p	589.802	556.61	663.019	46.5166	186.366	196.928
hsa-miR-30e-3p	5270.02	3436.49	4844.42	96.2707	157.865	76.2605
hsa-miR-155-5p	807.29	687.615	926.965	4935.28	4873.67	6732.95
unconservative_11_12153	4297.94	3315.64	5280.24	121.561	116.264	110.092
hsa-miR-143-3p	374.21	416.483	489.057	102.073	142.447	173.549
hsa-let-7a-3p	370.125	303.025	317.691	7608.33	5316.91	5159.98
hsa-miR-122-5p	1167.67	1136.3	1199.04	2465.14	3144.26	3286.11
hsa-miR-125a-3p	76.7097	47.2319	61.6007	136.604	120.57	128.97
hsa-miR-25-3p	5139.06	4725.82	5552.31	7260.7	6888.05	7560.66
hsa-miR-200c-3p	3311.12	5422.66	5082.87	194.048	433.507	147.422
hsa-let-7g-5p	5261.26	5623.2	4899.32	3460.11	3612.84	3896.76
hsa-miR-221-5p	374.96	600.104	752.179	3719.32	2738.66	2553.32
hsa-miR-429	434.22	326.894	372.637	127.311	0	0
hsa-miR-28-3p	493.475	495.315	531.958	1272.93	1111	947.839
hsa-miR-183-5p	6537.44	4987.77	3819.55	176.821	130.962	184.203
hsa-miR-29b-1-5p	428.528	441.109	466.643	261.027	179.128	279.014
hsa-miR-7976	0	35.3874	98.4622	359.405	289.622	259.96
hsa-miR-203a-3p	4053.21	6852.97	6753.12	170.913	144.852	148.833
hsa-miR-27a-5p	192.35	237.983	300.624	847.085	1206.1	879.634
hsa-miR-196b-5p	1191.88	893.575	996.211	4199.44	6651.78	5426.62
hsa-miR-148b-5p	149.312	181.036	149.842	1453.68	2024.8	1246.69
hsa-miR-1-3p	407.01	495.877	367.643	196.965	132.252	103.64
hsa-miR-20a-5p	1797.13	1015.22	1688.78	153.877	118.971	96.8753
hsa-miR-29a-5p	53.2443	46.9703	83.6832	574.432	340.485	427.62
hsa-miR-30b-5p	483.79	367.115	559.165	0	151.755	0
hsa-miR-222-3p	411.85	472.554	365.66	1003.35	744.023	843.505
