# Supplementary material for: Epithelial cell-derived exosomes carry NamiRNA-143-5p and promote ASPN expression in fibroblasts to drive Helicobacter pylori infected gastritis progression
Source: Research Square preprint supplement (doi:10.21203/rs.3.rs-7945968/v1), 2025-11-24
Supplement: Supplementary file 1 [file d558ffcabbebdf842faf4cea.pdf]

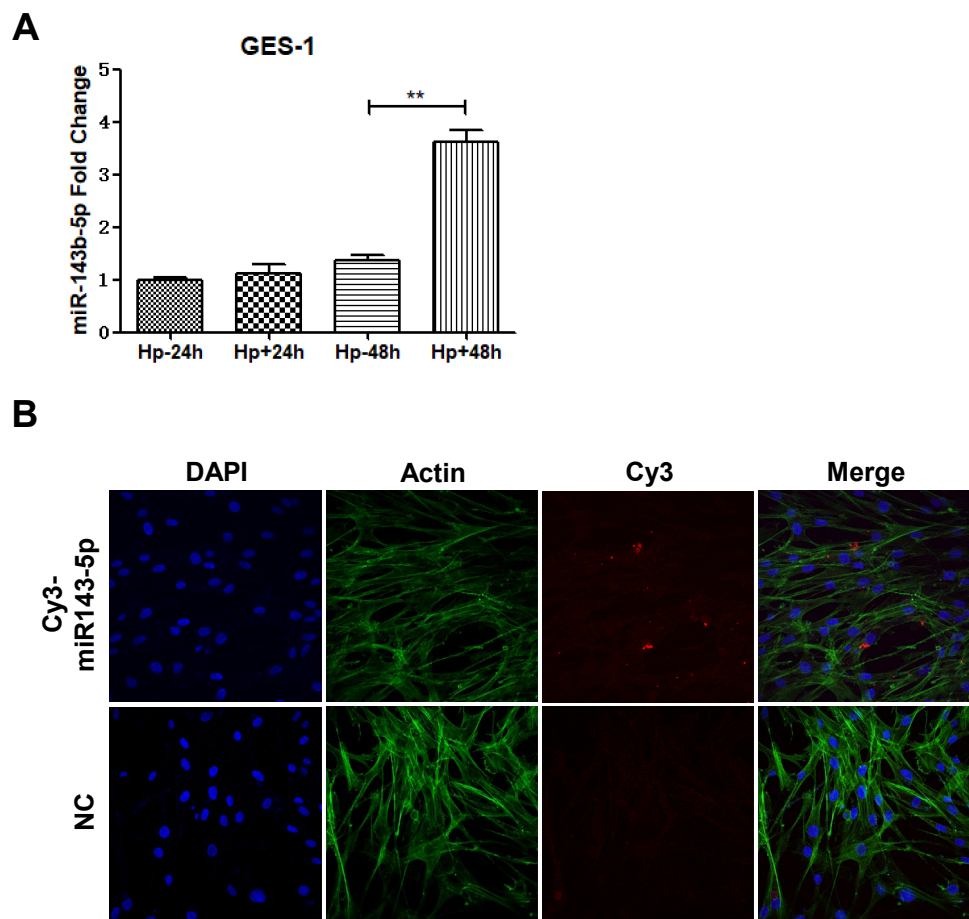

**Fig. S1 (A)** PCR analysis of miR-143-5p in GES-1 under Hp-/Hp+ condition  
**(B)** Cy3-labeled miR-143-5p was transfected into GES-1 cells and then co-cultured with GF. IF staining of GF were conducted (Blue: DAPI, Green: Actin Tracker, Red: Cy3-labeled miR-143-5p).

A

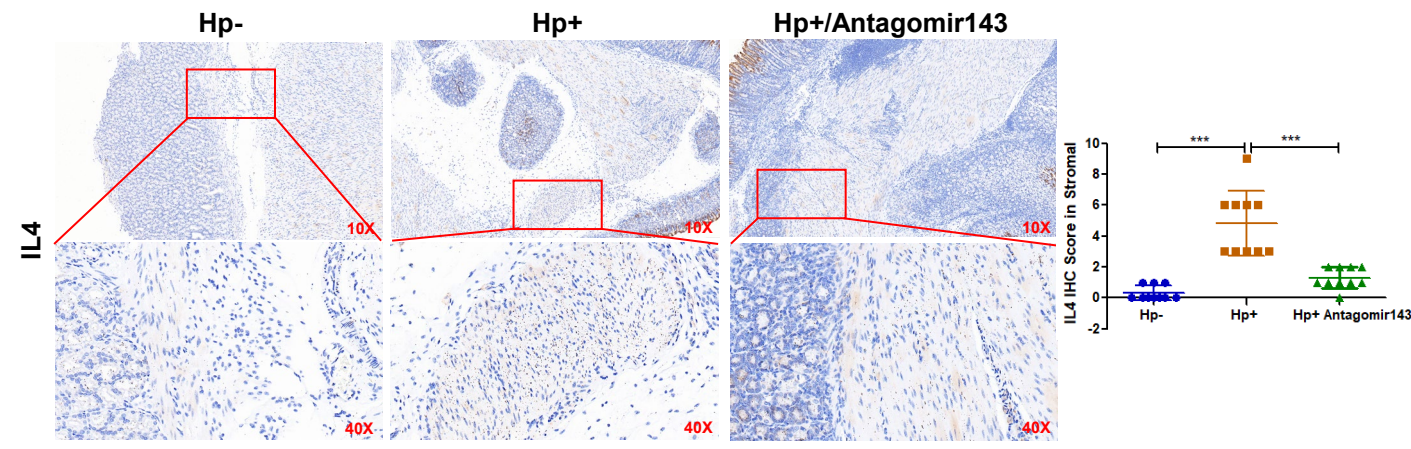

**Fig. S2 (A)** IHC staining of IL-6 in gastric mucosa across three groups: Hp<sup>-</sup>, Hp<sup>+</sup>, and Hp<sup>+</sup>/Antagomir-143.
