# Supplementary material for: Epithelial cell-derived exosomes carry NamiRNA-143-5p and promote ASPN expression in fibroblasts to drive Helicobacter pylori infected gastritis progression
Source: Research Square preprint supplement (doi:10.21203/rs.3.rs-7945968/v1), 2025-11-24
Supplement: Supplementary file 2 [file 78d5a1ea251789e268f04420.docx]

**Table S1.** **Information of primary antibodies used in WB and IHC**

| **Primary Antibody** | **Company** | **Cat.** | **Host** | **Clone** | **Dilution Factor** |
| --- | --- | --- | --- | --- | --- |
| GAPDH | Proteintech | 60004-1-1g | Mouse | Monoclonal | WB 1:1000 |
| ASPN | Abcam | ab58741 | Rabbit | Polyclonal | WB 1:200  IF 1:50 |
| ASPN | Sigma | HPA024230 | Rabbit | Polyclonal | IHC 1:200 |
| IL6 | Proteintech | 66146-1-1g | Mouse | Monoclonal | WB 1:200  IHC 1:200 |
| Vimentin | CST | 5741 | Rabbit | Monoclonal | WB 1:1000  IHC 1:200 |
| IL4 | Proteintech | 66142-1-1g | Mouse | Monoclonal | WB 1:200  IHC 1:200 |
| TGF-beta | Proteintech | 26155-1-AP | Rabbit | Polyclonal | WB 1:200  IHC 1:200 |
| GM130 | Proteintech | 11308-1-AP | Rabbit | Polyclonal | WB 1:200 |
| CD63 | Proteintech | 25682-1-AP | Rabbit | Polyclonal | WB 1:200 |
| TSG101 | Proteintech | 28283-1-AP | Rabbit | Polyclonal | WB 1:200 |
| CD9 | Proteintech | 20597-1-AP | Rabbit | Polyclonal | WB 1:200 |
| β-actin | Proteintech | 66009-1-Ig | Mouse | Monoclonal | IF 1:50 |
| Helicobacter pylori | ThermoFisher | MA5-44564 | Rabbit | Monoclonal | IHC 1:200 |

**Table S2. Information of primers used in RT-qPCR.**

| **Primer** | **Sequence** | **Base number** |
| --- | --- | --- |
| ASPN F | CTCTGCCAAACCCTTCTTTAGC | 22 |
| ASPN R | CGTGAATAGCACTGACATCCAA | 22 |
| GAPDH F | GGAGCGAGATCCCTCCAAAAT | 21 |
| GAPDH R | GGCTGTTGTCATACTTCTCATGG | 23 |
| IL6 F | ACTCACCTCTTCAGAACGAATTG | 23 |
| IL6 R | CCATCTTTGGAAGGTTCAGGTTG | 23 |
| IL4 F | ATGGGTCTCACCTCCCAACT | 20 |
| IL4 R | GATGTCTGTTACGGTCAACTCG | 22 |
| TGF-beta F | CTAATGGTGGAAACCCACAACG | 22 |
| TGF-beta R | TATCGCCAGGAATTGTTGCTG | 21 |
| hsa-miR-143-5p-RT | GTCGTATCGACTGCAGGGTCCGAGGTATTCGCAGTCGATACGACACCAGA | 50 |
| hsa-miR-143-5p-F | CGGTGCAGTGCTGCATC | 17 |

**Table S3. Information of primers used in ChIP-PCR.**

| **Primer** | **Sequence** | **Base number** |
| --- | --- | --- |
| miR-143- ChIP F | CAGGAAACAGTGGCCACATG | 20 |
| miR-143- ChIP R | AGGATCCTTTTATGTGTGTGGG | 22 |
